# Supplementary material for: Toward an improved definition of a healthy microbiome for healthy aging
Source: PubMed Central journal article supplement (PMC10154212; doi:10.1038/s43587-022-00306-9), 2022-11-17

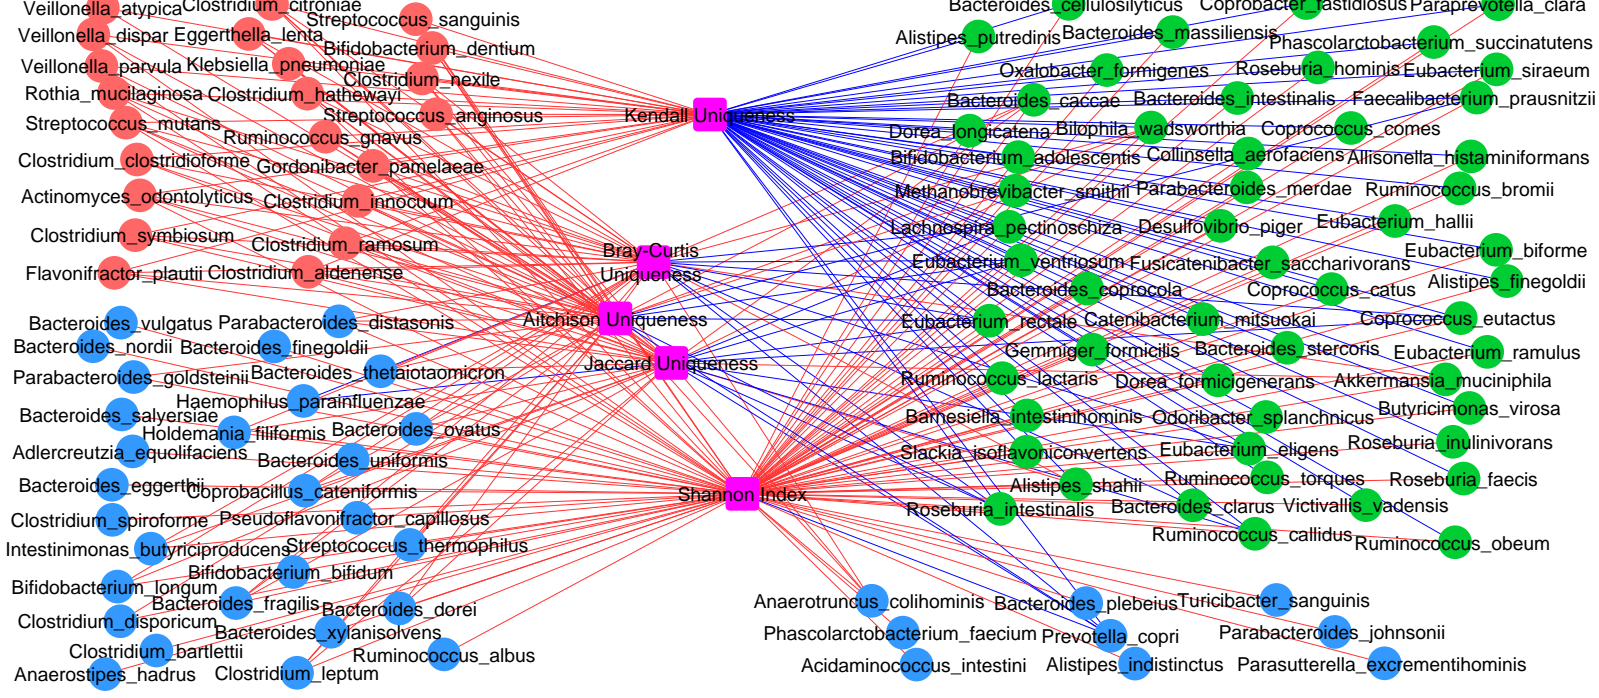

Supplement: 43587_2022_306_MOESM11_ESM.pdf [file 43587_2022_306_MOESM11_ESM.pdf]
